# Supplementary material
Source: JCI journal article supplement (doi:10.1172/jci189510)

## Supplemental Methods

*Tracking of indels by decomposition (TIDE).* gDNA extraction was performed with QIAGEN columns. Target-specific PCR products were generated and sequenced by Azenta for analysis of CRISPR-Cas9 editing in CD73-KO, A1R-KO, and A2BR-KO cell lines. The TIDE webtool (available for free courtesy of Eva Brinkman, Tao Chen and Bas van Steensel) was used to calculate the frequency and spectrum of genome alterations introduced by CRISPR-Cas9 editing in *NT5E*, *ADORA1*, and *ADORA2B* genes (1).

*Immunofluorescence.* Cells grown on 18x18 mm coverslips were fixed (4% paraformaldehyde), permeabilized (0.1% Triton X-100), and blocked (Background Sniper, Biocare Medical). Primary antibodies were incubated overnight at 4°C, followed by secondary antibodies. Bleed-through controls included single antibody/fluorochrome incubations. For nuclear localization of myc-tagged *Xenopus*  $\beta$ -catenin <sup>$\Delta$ EX3</sup>, ~90 images/group (20X) were captured and fluorescence intensity determined with BZ-X800 Analyzer Macro Cell Counting software (Keyence).

*Co-immunoprecipitation (Co-IP).* HEC-1-A CD73-WT and -KO cells were transfected with *Xenopus*  $\beta$ -catenin <sup>$\Delta$ EX3</sup>, G34R mutated  $\beta$ -catenin vector, or S37F mutated  $\beta$ -catenin vector (2  $\mu$ g). Co-IP was performed using a Pierce myc-tag Magnetic IP/Co-IP Kit (Thermo Scientific). Protein (500  $\mu$ g) was incubated overnight at 4°C with 25  $\mu$ l anti-myc magnetic beads. The resulting immune-bound complexes were eluted in 2X reducing sample buffer and assessed by SDS-PAGE and immunoblotting methods.

*RNA extraction for RNA-sequencing.* HEC-1-A CD73 WT or KO cells were plated ( $5 \times 10^5$ /well, 6-well plates), transfected at ~85% confluency with empty vector (LentiV\_Neo) or D32N, G34R, or S37F  $\beta$ -catenin mutant constructs (2  $\mu$ g), and harvested 48 hours later. Cells were washed with 1X PBS, frozen at -80 °C, and RNA isolated using QIAshredder and RNeasy Mini Kits (QIAGEN). RNA concentration was measured by Nanodrop, and integrity confirmed by agarose gel electrophoresis. Secondary QC and RNA sequencing were performed by Novogene.

*RNA-seq analyses.* Stranded Bulk mRNA sequencing was performed on Poly-T selected total RNA isolates following size distribution detection (Novogene). Transcriptomic sequences were gathered at 150bp paired-end reads at or exceeding 35 million reads per replicate. Several analyses were performed on the sequences: mapping by hisat2 (2.05), assembly by Stringtie (1.3.3b), quantification by featureCount (1.5.0-p3), and DE analysis by DESeq2 (1.20.0). R2 Genomics Analysis and Visualization Platform (<http://r2.amc.nl>) (2) was used in Figure 8D.

### **Supplemental References**

1. Brinkman EK, Chen T, Amendola M, and van Steensel B. Easy quantitative assessment of genome editing by sequence trace decomposition. *Nucleic Acids Research*. 2014;42(22):e168.
2. Koster J, Volckmann R, Zwiijnenburg D, Molenaar P, and Versteeg R. Abstract 2490: R2: Genomics analysis and visualization platform. *Cancer Research*. 2019;79(13\_Supplement):2490.

### Supplemental Table 1

Clinicopathological features of qRT-PCR cohort of exon 3 *CTNNB1*-mutant endometrial carcinomas.

| <b>Characteristics (n = 28)</b>      | <b>No Recurrence</b> | <b>Recurrence</b> |
|--------------------------------------|----------------------|-------------------|
| Histology                            | <b>n =</b>           | <b>n =</b>        |
| Endometrioid                         | 17                   | 10                |
| Non-endometrioid                     | 1                    | 0                 |
|                                      |                      |                   |
| FIGO Stage                           | <b>n =</b>           | <b>n =</b>        |
| I                                    | 13                   | 8                 |
| II                                   | 1                    | 0                 |
| III                                  | 3                    | 1                 |
| IV                                   | 0                    | 1                 |
| Unknown                              | 1                    |                   |
|                                      |                      |                   |
| Grade                                | <b>n =</b>           | <b>n =</b>        |
| G1                                   | 2                    | 2                 |
| G2                                   | 15                   | 7                 |
| G3                                   | 1                    | 1                 |
|                                      |                      |                   |
| Lymphovascular Space Invasion (LVSI) | <b>n =</b>           | <b>n =</b>        |
| Yes                                  | 4                    | 4                 |
| No                                   | 14                   | 4                 |
| Unknown                              |                      | 2                 |

## Supplemental Table 2

### Antibodies

| <b>Antibody</b>                     | <b>Source</b>     | <b>Company</b>      | <b>Catalog #/Clone</b>     |
|-------------------------------------|-------------------|---------------------|----------------------------|
| Alexa Fluor 594 goat anti-mouse IgG | Goat polyclonal   | Invitrogen          | #A21206                    |
| Alexa Fluor 594 goat anti-mouse IgG | Goat polyclonal   | Invitrogen          | #A11032                    |
| Goat anti-mouse biotinylated IgG    | Goat polyclonal   | Vector Laboratories | #BP-9200-50                |
| $\beta$ -catenin (WB)               | Rabbit polyclonal | Cell Signaling      | #8480/D10AB                |
| $\beta$ -catenin (IHC)              | Mouse monoclonal  | BD Biosciences      | #310154/Clone 14           |
| CD73                                | Rabbit monoclonal | Cell Signaling      | #13160/D7F9A               |
| CD73                                | Mouse monoclonal  | HycultBiotech       | #HM2215/4G4                |
| E-cadherin                          | Mouse monoclonal  | BD Biosciences      | #610181/<br>#36/E-Cadherin |
| GAPDH                               | Rabbit polyclonal | Cell Signaling      | # 3683/14C10               |
| HRP-conjugated anti-mouse IgG       | Horse             | Cell Signaling      | #7076                      |
| HRP-conjugated anti-rabbit IgG      | Goat              | Cell Signaling      | #7074                      |
| Myc-tag (WB)                        | Rabbit polyclonal | Cell Signaling      | #2278/71D10                |
| Myc-tag (IF)                        | Mouse monoclonal  | Cell Signaling      | #2276/9B11                 |
| SP 1                                | Rabbit polyclonal | Cell Signaling      | #9389/D4C3                 |
| Rab11a                              | Rabbit polyclonal | ABClonal            | #A3251/ARC0767             |
| H2AX                                | Rabbit polyclonal | Cell Signaling      | #7631/D17A3                |
| $\alpha$ -catenin                   | Rabbit monoclonal | Cell Signaling      | #3240/23B2                 |
| GAPDH-HRP                           | Rabbit monoclonal | Cell Signaling      | #3683S/14c10               |

### Supplemental Table 3

Genes in heatmaps of Figure 7A and 7B.

| Figure 7A |                      | Figure 7B |                      |
|-----------|----------------------|-----------|----------------------|
| Position  | Gene (Top to Bottom) | Position  | Gene (Top to Bottom) |
| 1         | MNS1                 | 1         | NT5E                 |
| 2         | NT5E                 | 2         | THSD7A               |
| 3         | LGR5                 | 3         | CCDC87               |
| 4         | CCL28                | 4         | KLLN                 |
| 5         | RHOA                 | 5         | MYLK3                |
| 6         | SOX17                | 6         | DNAH2                |
| 7         | LEF1                 | 7         | SMOC1                |
| 8         | JUN                  | 8         | MYOM2                |
| 9         | SLC7A2               | 9         | MSX2                 |
| 10        | GLS2                 | 10        | CYP4X1               |
| 11        | LOXL3                | 11        | ENTPD3               |
| 12        | SLC16A10             | 12        | SOX5                 |
| 13        | MYC                  | 13        | ANKRA2               |
| 14        | ABCC4                | 14        | ITGA10               |
| 15        | GRAMD1A              | 15        | MSX1                 |
| 16        | AXIN1                | 16        | c19orf73             |
| 17        | CDCA4                | 17        | BICDL2               |
| 18        | POLR1G               | 18        | ELMO3                |
| 19        | PPARD                | 19        | ANKRD24              |
| 20        | EN2                  | 20        | IFI44L               |
| 21        | ALDH1A1              | 21        | DDX60                |
| 22        | MMP7                 | 22        | NKX2.3               |
| 23        | SCARA3               | 23        | HOXA9                |
| 24        | JAC1                 | 24        | UNC5C                |
| 25        | CLDN1                | 25        | ZFAND2A              |
| 26        | ID2                  | 26        | H2BC15               |
| 27        | LRRN1                | 27        | HEBC11               |
| 28        | FN1                  | 28        | H2AC6                |
| 29        | CCN4                 | 29        | ZNF229               |
| 30        | SNAI1                | 30        | THRB                 |
| 31        | FZDF                 | 31        | ASCL4                |
| 32        | NEUROD1              | 32        | IGSF21               |
| 33        | PITX2                | 33        | CCDC85A              |
| 34        | GBX2                 | 34        | PAX2                 |
| 35        | CD274                | 35        | INSC                 |
| 36        | CTLA4                | 36        | MAFB                 |

|    |          |    |          |
|----|----------|----|----------|
| 37 | NOS2     | 37 | P2RX5    |
| 38 | CSF3R    | 38 | FERMT3   |
| 39 | ADAMTS14 | 39 | SLC9A9   |
| 40 | PALD1    | 40 | JAK3     |
| 41 | FGF9     | 41 | BCL11B   |
| 42 | HDAC4    | 42 | TEX19    |
| 43 | TCF7     | 43 | PYGM     |
| 44 | PROX1    | 44 | BMPER    |
| 45 | DKK1     | 45 | CALCB    |
| 46 | IL10     | 46 | TLL1     |
| 47 | FGF20    | 47 | C1QL1    |
| 48 | BAMBI    | 48 | PRPH     |
| 49 | AXIN2    | 49 | FIBIN    |
| 50 | NOTUM    | 50 | EYA1     |
| 51 | NKD1     | 51 | ADAMTS5  |
| 52 | BMP4     | 52 | ANKLE1   |
| 53 | SP5      | 53 | MSTN     |
| 54 | RNF43    | 54 | PLAT     |
| 55 | ZNRF3    | 55 | MYH11    |
| 56 | CCND1    | 56 | ADGRA2   |
| 57 | STRA6    | 57 | PIK3IP1  |
| 58 | GJA1     | 58 | SLC7A8   |
| 59 | SOX9     | 59 | ST8SIA2  |
| 60 | EPHB3    | 60 | AXIN2    |
| 61 | LBH      | 61 | NKD1     |
| 62 | TIAM1    | 62 | SP5      |
| 63 | MSI1     | 63 | GPR83    |
| 64 | FAM216A  | 64 | TCF7     |
| 65 | TFAP4    | 65 | CCBE1    |
| 66 | TEAD4    | 66 | ETV1     |
| 67 | ANKD13B  | 67 | DDK1     |
| 68 | FOSL1    | 68 | SYTL2    |
| 69 | CBX2     | 69 | SCUBE1   |
| 70 | NES      | 70 | RRH      |
| 71 | GINS3    | 71 | LRIT3    |
| 72 | PDK1     | 72 | CCNG2    |
| 73 | ZNF724   | 73 | CREBRF   |
| 74 | FAM111B  | 74 | RASGEF1B |
| 75 | DTL      | 75 | RASSF6   |
| 76 | ZNF367   | 76 | RNF19B   |
| 77 | FOXRED2  | 77 | CLDN1    |
| 78 | UHRF1    | 78 | B3GNT3   |
| 79 | MCM2     | 79 | CCND1    |

|    |       |    |         |
|----|-------|----|---------|
| 80 | GINS2 | 80 | RGS4    |
| 81 | CDT1  | 81 | COL7A1  |
| 82 | RFC4  | 82 | NMNAT3  |
| 83 | VEGFA | 83 | PIP5KL1 |
| 84 | PLAUR | 84 | SNAI3   |
|    |       | 85 | ADCY5   |
|    |       | 86 | NEDD9   |
|    |       | 87 | HBP1    |
|    |       | 88 | PLXNA2  |
|    |       | 89 | CACNA1D |
|    |       | 90 | DLL1    |
|    |       | 91 | UQCRHL  |
|    |       | 92 | BAG1    |
|    |       | 93 | RPL41   |
|    |       | 94 | NTMT1   |
|    |       | 95 | ZNF503  |
|    |       | 96 | B3GNT7  |
|    |       | 97 | HRH1    |
|    |       | 98 | CBLN3   |
|    |       | 99 | TSHZ1   |

**Supplemental Figure 1. CD73 expression stratified by FIGO stage, LVSI, and non-nuclear and nuclear  $\beta$ -catenin ROIs in *CTNNB1*-mutant endometrial tumors.**

Whole tumor mRNA for CD73 stratified **(A)** FIGO stage ( $n = 28$ ) and **(B)** LVSI ( $n = 27$ ).

Box plots show median, IQR, mean (cross), whiskers ( $\pm 1.5 \times \text{IQR}$ ), and outliers (circles).

Values are molecules of CD73 transcripts/molecules of 18S rRNA. **(C)** DSP data for CD73 mRNA expression in  $n = 16$  NGS-confirmed exon 3 *CTNNB1*-mutant endometrial tumors. Three nuclear and non-nuclear ROIs were sampled for each tumor (unless otherwise indicated, see individual circles for each tumor). Data represent the mean  $\pm$  SEM. \* $P < 0.05$ , \*\* $P < 0.005$ , \*\*\* $P < 0.0005$ , \*\*\*\* $P < 0.0001$ ; two-way ANOVA with Sidak's post test

# Supplemental Figure 1

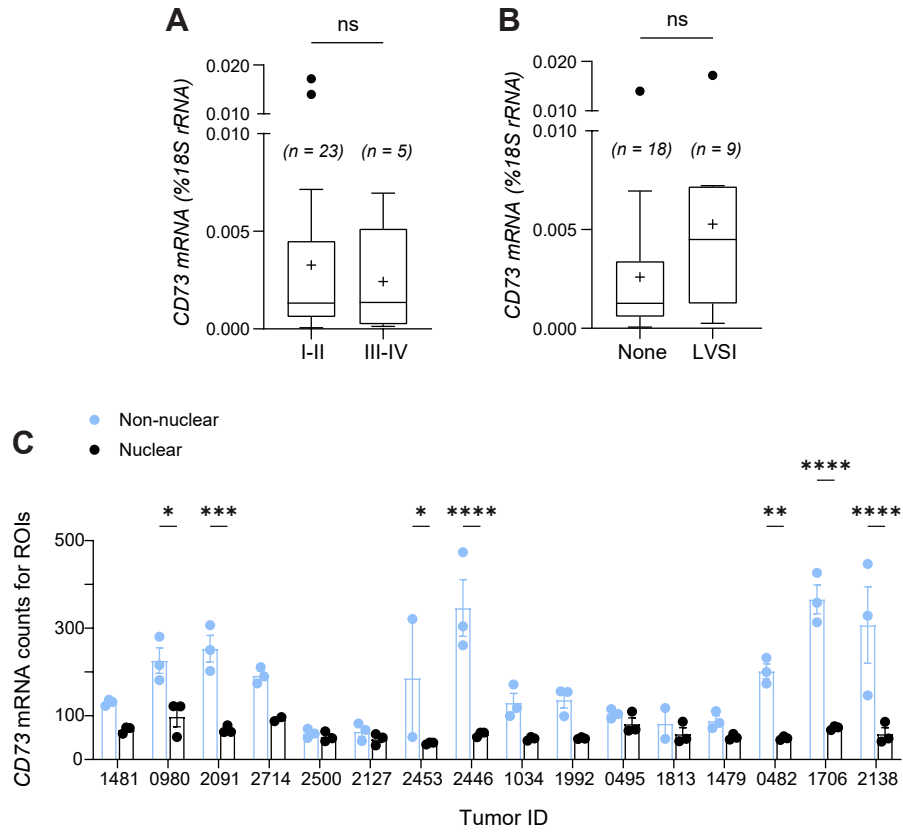

**Supplemental Figure 2. Induced expression of CD73 via *NT5E* adenovirus**

**transduction in Ishikawa cells. (A)** CD73 protein expression with different *NT5E* AdV viral titers compared with HEC-1-A cells which serve as positive controls. CD73 Positive Control 1 = HEC-1-A cells at 100% confluency, 2 = HEC-1-A cells at 2 days post-confluency. **(B)** Validation of continued CD73 expression in Ishikawa cells. Expression 91 persists for 96 hours, the endpoint in which TCF/LEF luciferase assays were performed. HEC-1-A cells serve as CD73 positive controls. **(C)** Uncropped immunofluorescence images corresponding to Figure 2H. Cropped areas indicated with white rectangle. Scale bars 20 um.

# Supplemental Figure 2

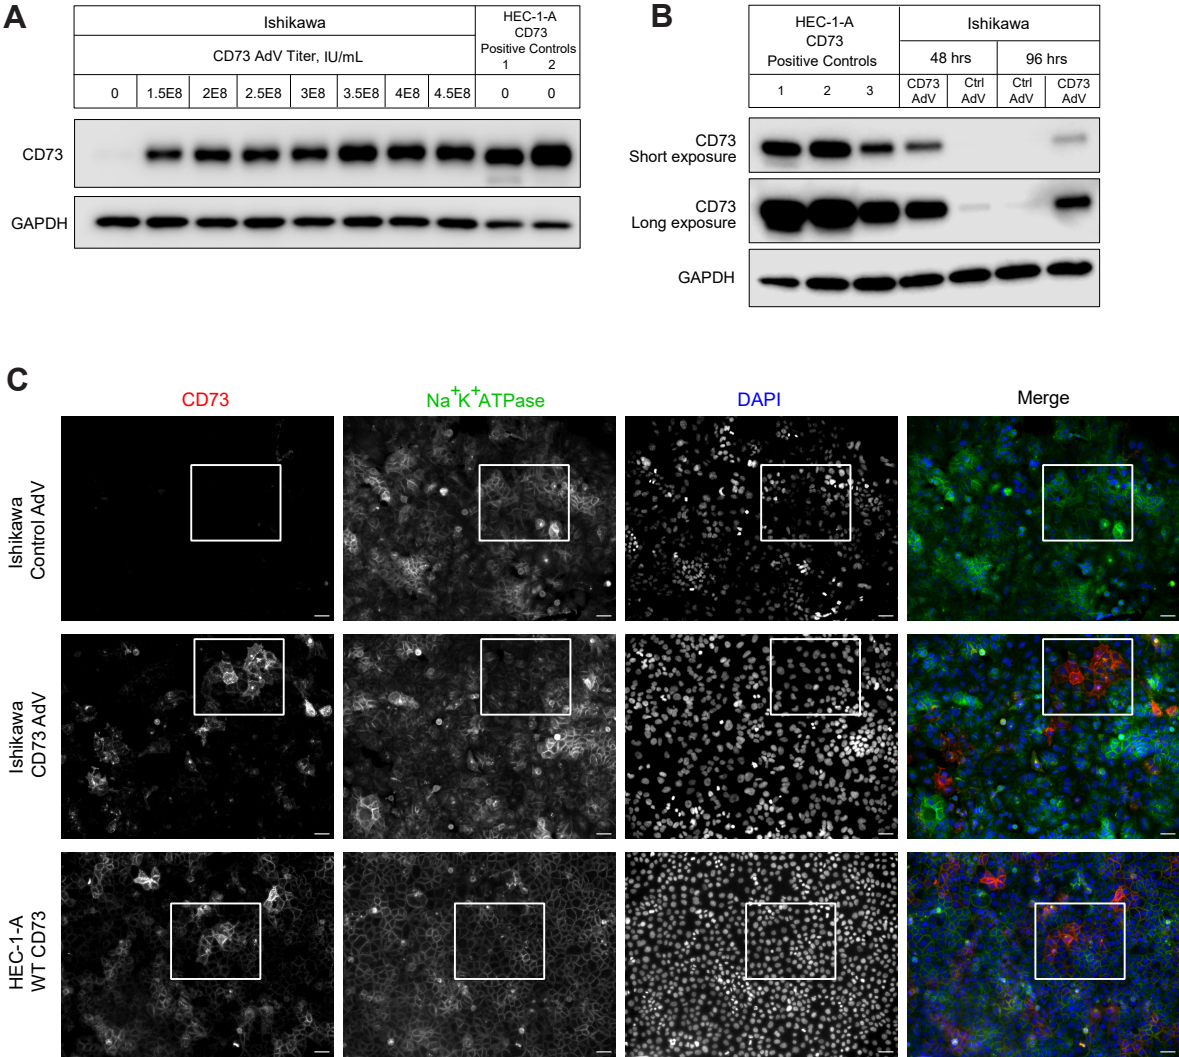

**Supplemental Figure 3. CD73 restrains transcriptional activity of  $\beta$ -catenin mutant G34R. (A-D)** Validation of TCF/LEF reporter activity for patient-specific  $\beta$ -catenin mutant G34R in Ishikawa cells. Additional independent experiments were conducted with G34R due to variability observed with the mutant as seen in Figure 3E. Reporter assays were performed in Ishikawa cells with no empty vector transfection (endogenous, **A**) and transfection of an empty vector (**B-C**) in addition to *NT5E* (CD73) AdV DNA constructs. **(D)** Combination of data from **(B)** and **(C)**. Three independent experiments are shown for  $\beta$ -catenin mutant G34R, which are **(A)**, **(B)**, and **(C)**. Data represent the mean  $\pm$  SEM. \*\*\*P < 0.005, \*\*\*\*P < 0.0001; two-way ANOVA with uncorrected Fisher's LSD.

# Supplemental Figure 3

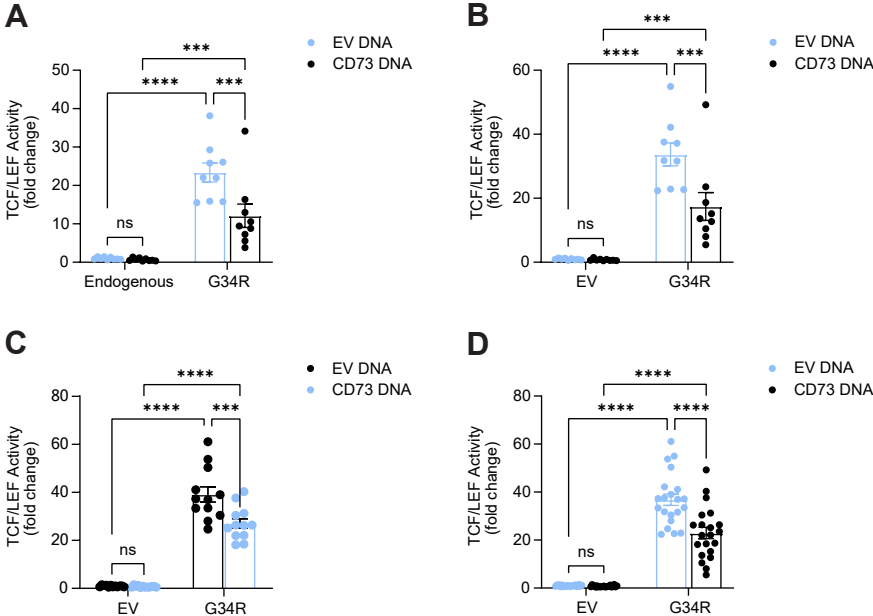

**Supplemental Figure 4. Independent replicates of cellular fractionations with**

**patient-specific  $\beta$ -catenin mutations. (A-E)** Independent replicates of cellular

fractionation experiments described in Figure 4 from CD73-WT and -KO HEC-1-A cells.

CD73-WT and -KO HEC-1-A cells were transfected with **(A)** *Xenopus*  $\beta$ -catenin <sup>$\Delta$ EX3</sup> or

patient-specific  $\beta$ -catenin mutants **(B)** S37F or **(C-E)** G34R.  $\beta$ -catenin mutant G34R

showed the most variability between independent replicates. Densitometry graphs are

shown for myc- $\beta$ -catenin mutant expression for each cellular fraction normalized to myc-

$\beta$ -catenin mutant expression in the whole cell lysate (WCL) in addition to total protein.

Cellular fraction markers: Rab11a (membrane), SP1 (nuclear), and H2AX (chromatin).

# Supplemental Figure 4

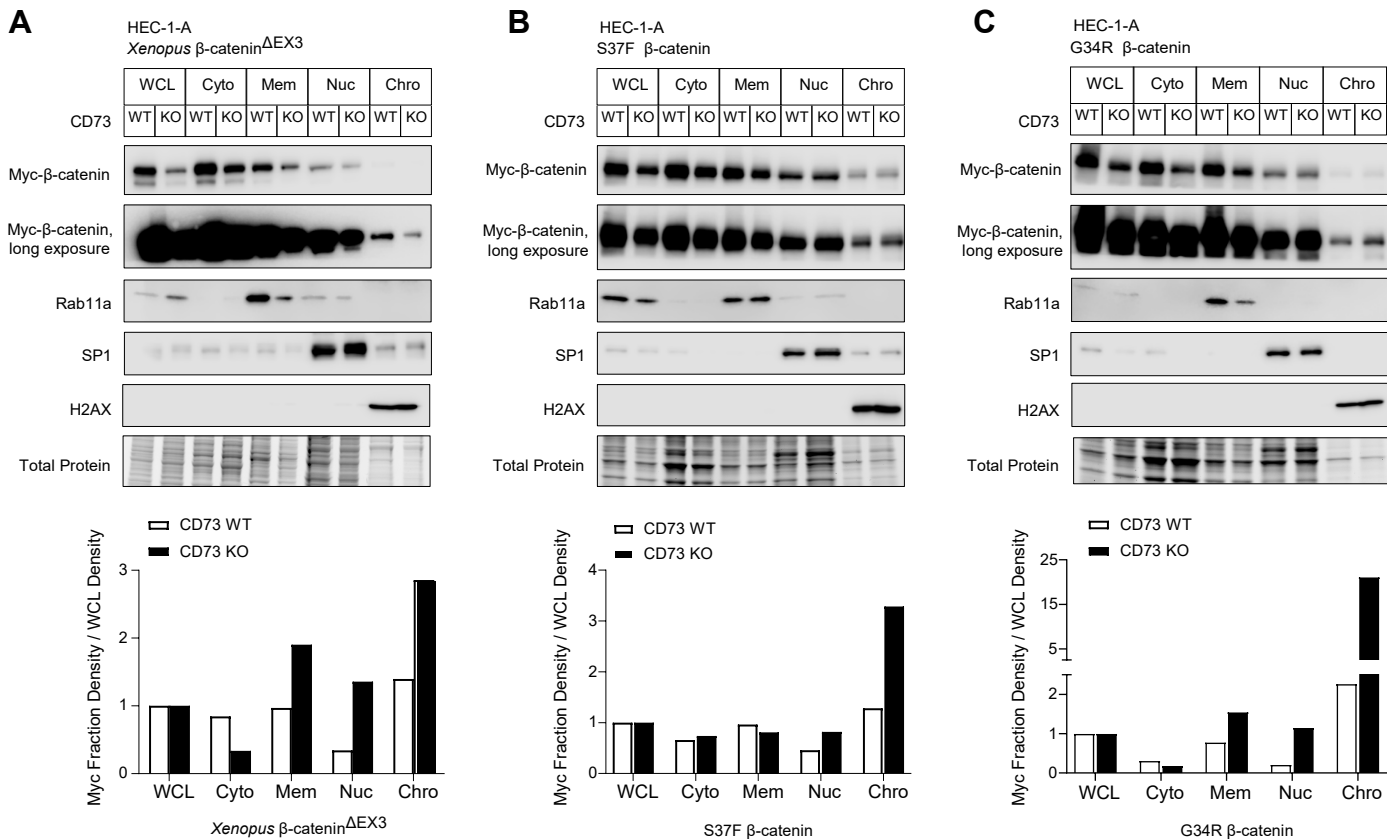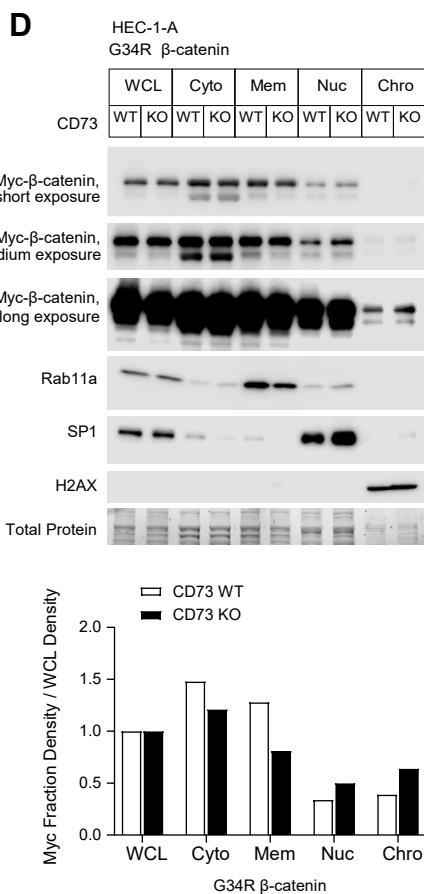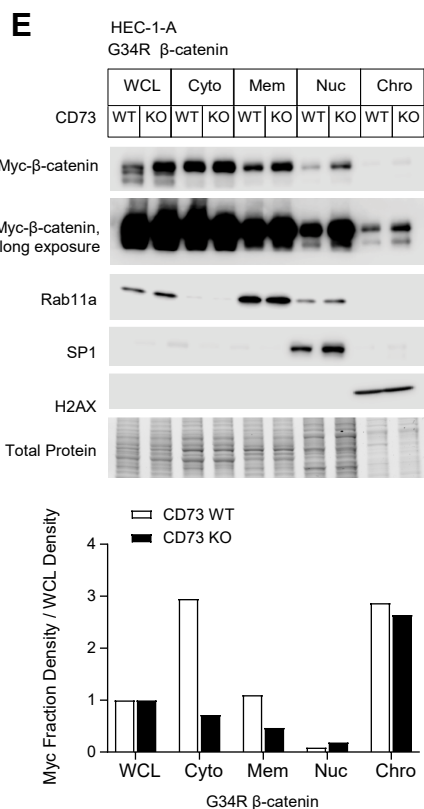

**Supplemental Figure 5. Patient-specific exon 3  $\beta$ -catenin mutant binds with E-cadherin.** Immunoblots from co-immunoprecipitation experiment in CD73-WT and -KO HEC-1-A cells. Myc- $\beta$ -catenin was precipitated and samples were probed for E-cadherin and myc-tagged expression of  $\beta$ -catenin mutant G34R. Downregulation of E-cadherin **(B)** and other cell-cell adhesion and barrier function genes **(B-C)** occurs in CD73-KO cells compared with CD73-WT cells. **(C)** RNA-seq data from CD73-KO and -WT cells. Data represent the mean  $\pm$  SEM. \*\*P < 0.001, \*\*\*P < 0.0005, \*\*\*\*P < 0.0001; multiple unpaired t test (2-tailed).

# Supplemental Figure 5

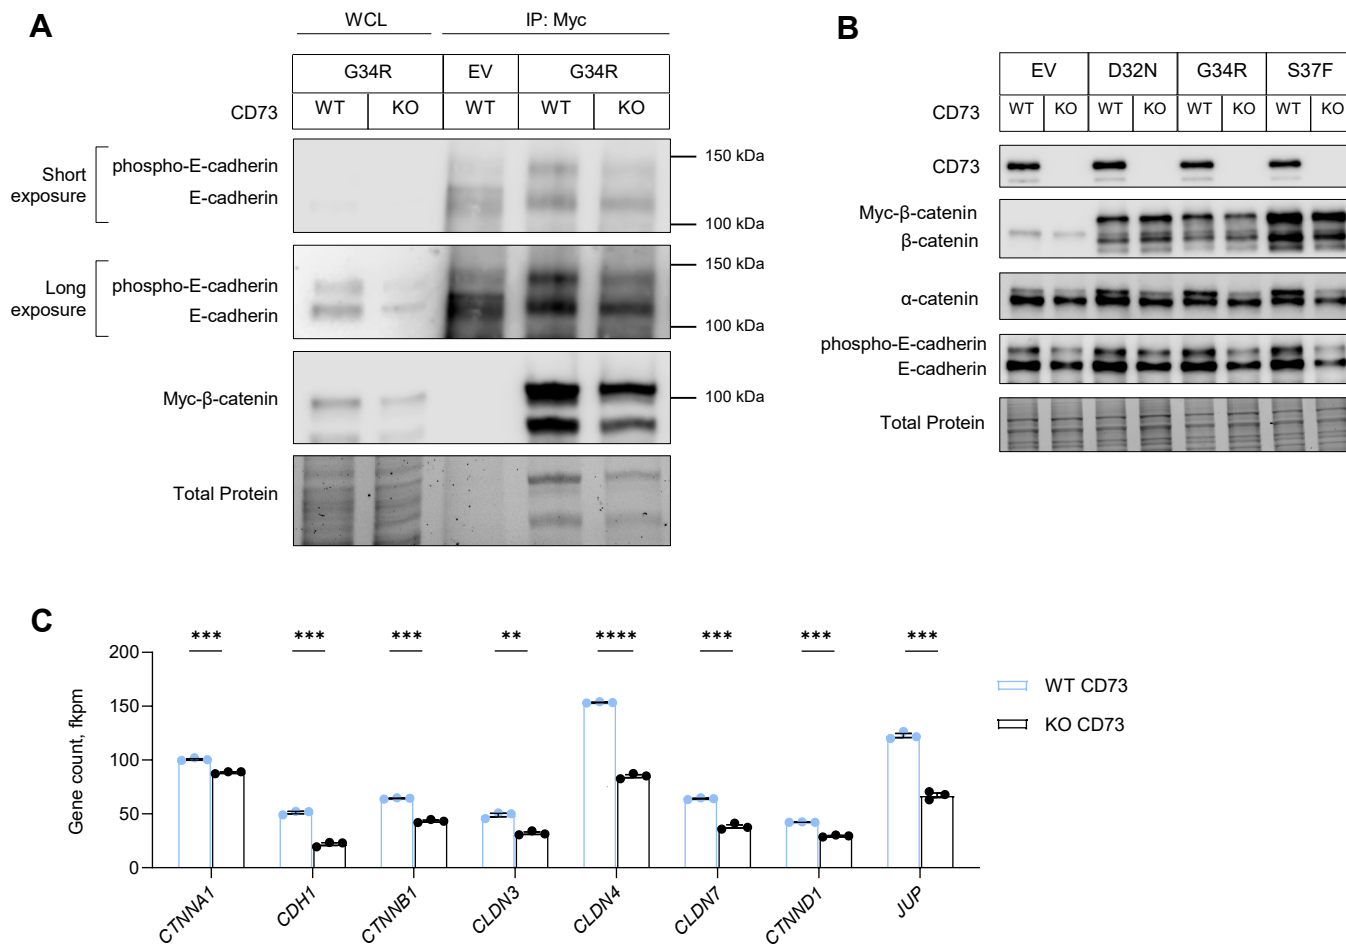

**Supplemental Figure 6. Reduced transcriptional activity of patient-specific  $\beta$ -catenin mutants in A1R KO cells.** (A) Immunoblot showing E-cadherin expression is unchanged in *ADORA1* (A1R)-KO and *ADORA2B* (A2BR)-KO cells compared with WT HEC-1-A cells. (B-C) Independent replicate experiments for data shown in Figure 5E. TCF/LEF reporter activity in cells transfected with empty vector (EV) or patient-specific  $\beta$ -catenin mutants D32N, G34R, or S37F. Each dot represents one technical replicate. Data represent mean  $\pm$  SEM. \*P < 0.05, \*\*\*\*P < 0.0001; two-way ANOVA with Dunnett's post-test.

# Supplemental Figure 6

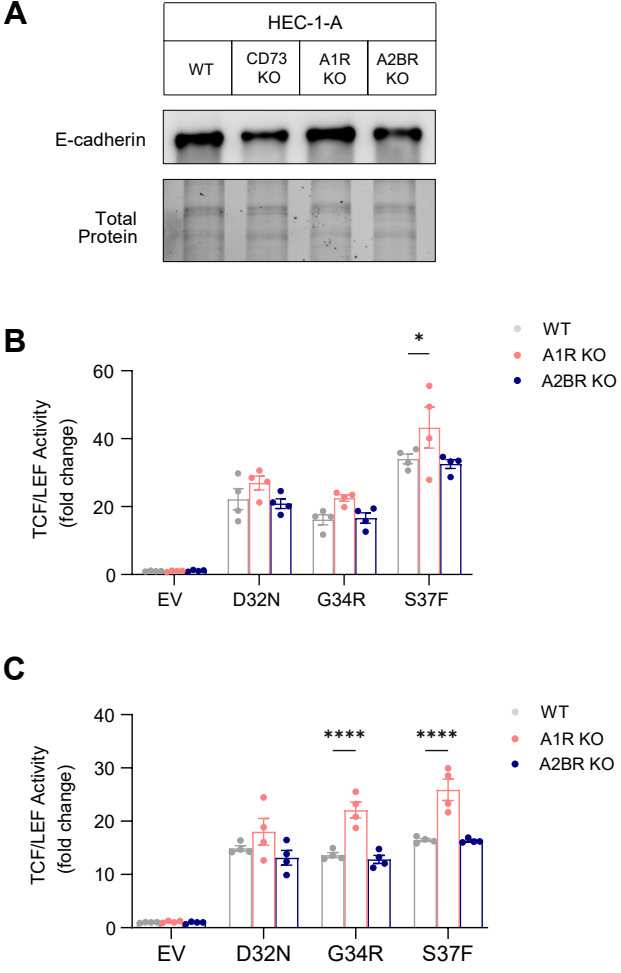

**Supplemental Figure 7. CD73 restrains invasiveness and stemness capacity of S37F and G34R  $\beta$ -catenin mutants. (A-B)** Independent replicate experiments for data shown in Figure 6B-6C. **(A)** Invasion and **(B)** spheroid-forming assays in Ishikawa cells with stable ectopic expression of CD73 (or empty vector) and either S37F or G34R  $\beta$ -catenin mutants. Data represent mean  $\pm$  SEM. \*\*\*\*P < 0.0001; Mann-Whitney t-test (2-tailed).

# Supplemental Figure 7

## A

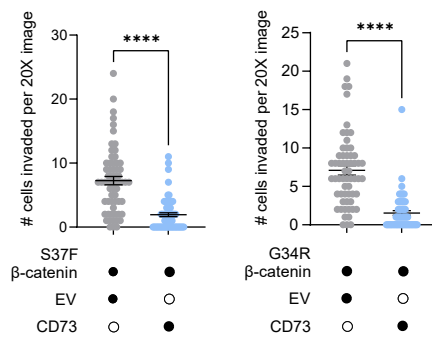

## B

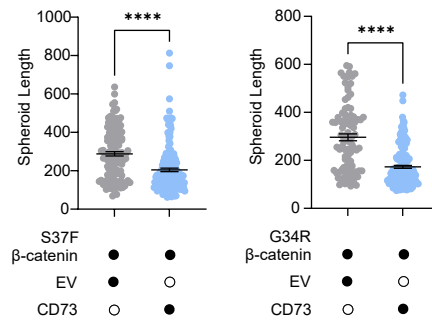

**Supplemental Figure 8. CD73, Wnt signaling, and  $\beta$ -catenin-dependent, TCF/LEF-dependent gene expression in Uterine Cancer TCGA dataset. (A)** CD73 levels in normal tissue and tumors. **(B)** CD73 mRNA expression in *CTNNB1*-mutant vs. -WT and CD73 High vs. Low early-stage EC. Unmarked heatmaps shown in Figure 7A and 7C of gene expression of gene lists: Wnt signaling **(C)** and  $\beta$ -catenin-dependent **(D)**. **(C-D)** Tumors are stratified by CD73 expression levels and without stratifying by *CTNNB1* genotype (mutant vs. WT). **(A)** 2-tailed t-test. **(B)** Data represent mean  $\pm$  SEM. Kruskal-Wallis test with Benjamini-Hochberg FDR, post-hoc Dunn test. \*\*\*P < 0.001.



**Supplemental Figure 9. Validation of patient-specific  $\beta$ -catenin mutant expression and activity in RNA-seq samples. (A)** Protein samples were collected in sync with samples process and submitted for RNA-sequencing. Immunoblots were used to assess equal or near equal expression of each patient-specific  $\beta$ -catenin mutant between CD73-WT and -KO HEC-1-A cells. Due to unequal protein expression of S33F between CD73 WT and CD73 KO samples, RNA from these samples was not submitted for sequencing. **(B)** Densitometry for myc-tagged  $\beta$ -catenin mutants from samples in **(A)**. **(C)** Mutation frequencies for  $\beta$ -catenin mutants D32N, G34R, and S37F in RNA sequences, calculated using Integrative Genomics Viewer. **(D-E)** Validation of our experimental system. **(D)** CD73 and  $\beta$ -catenin expression. **(E)**  $\beta$ -catenin mutants induce Wnt signaling gene targets TCF7 and AXIN2.

# Supplemental Figure 9

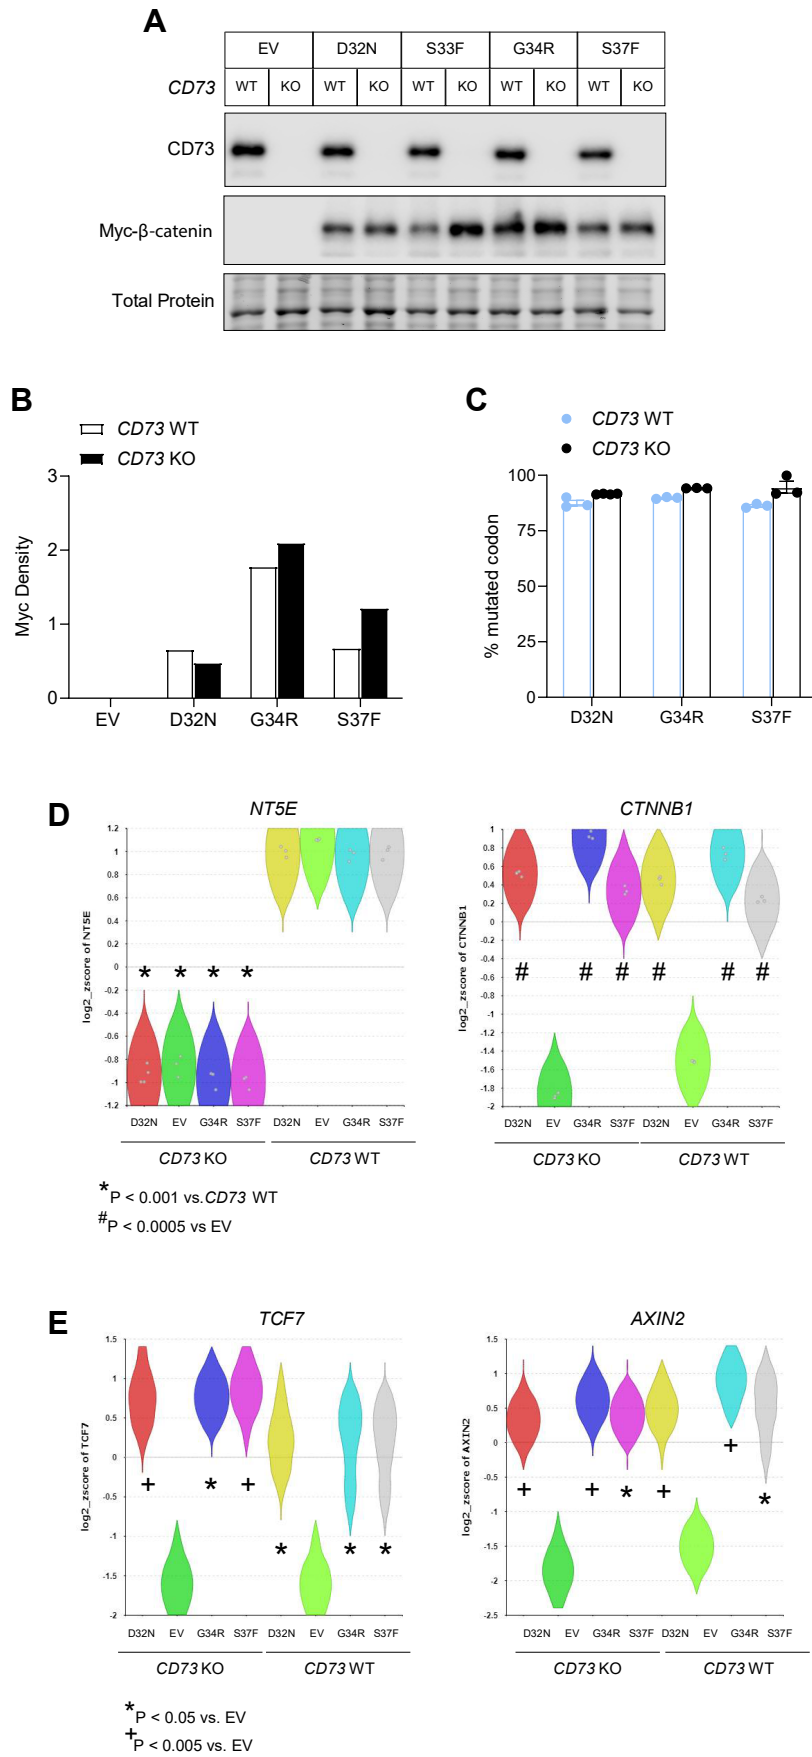

Supplement: sd1 [file 1]
